# Supplementary material
Source: Springer Nature journal article supplement (https://www.springermedizin.de/resource/supplementary/12889_2013_6066_MOESM2_ESM.pdf/9494356)

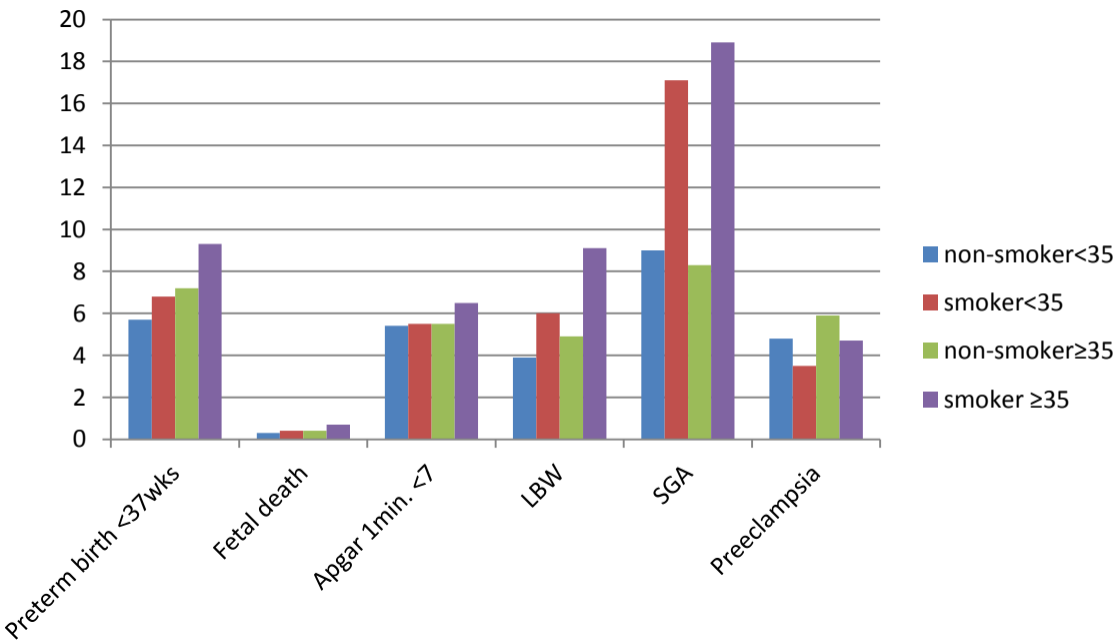

Supplement: MOESM2 [file 9494356]
